# Supplementary material for: Conditional immune toxicity rate in patients with metastatic renal and urothelial cancer treated with immune checkpoint inhibitors
Source: PubMed Central journal article supplement — J Immunother Cancer. 2020 Mar 30;8(1):e000371. doi: 10.1136/jitc-2019-000371 (PMC7174062; doi:10.1136/jitc-2019-000371), 2020-03-30
Supplement: jitc-2019-000371supp001.pdf [file jitc-2019-000371supp001.pdf]

**Supplementary table 1.** Cumulative incidence plot for irAEs grade $\geq$ 3

|                     | <b>6-month grade 3 irAE rate (95% CI)</b> | <b>1-year grade 3 irAE rate (95% CI)</b> |
|---------------------|-------------------------------------------|------------------------------------------|
| <b>All Patients</b> | 7.5% (5.0% to 10.0%)                      | 10.6% (7.6% to 13.6%)                    |
| <b>mRCC</b>         | 8.5% (5.0% to 12.0%)                      | 13.5% (9.0% to 18.0%)                    |
| <b>mUC</b>          | 6.2% (2.8% to 9.6%)                       | 6.8% (3.2% to 10.5%)                     |

irAEs: Immune-related adverse events; mRCC: metastatic renal cell carcinoma; mUC: metastatic urothelial carcinoma; CI: confidence interval
