# Supplementary material for: Conditional immune toxicity rate in patients with metastatic renal and urothelial cancer treated with immune checkpoint inhibitors
Source: PubMed Central journal article supplement — J Immunother Cancer. 2020 Mar 30;8(1):e000371. doi: 10.1136/jitc-2019-000371 (PMC7174062; doi:10.1136/jitc-2019-000371), 2020-03-30
Supplement: jitc-2019-000371supp002.pdf [file jitc-2019-000371supp002.pdf]

**Supplementary table 2.** Univariate and multivariate analysis of prognostic factors of irAEs.

| Variable                           | Category               | Univariate |            |        | Multivariate |           |        |
|------------------------------------|------------------------|------------|------------|--------|--------------|-----------|--------|
|                                    |                        | HR         | CI         | p      | HR           | CI        | p      |
| <b>Sex</b>                         | <i>Female</i>          | 1          |            |        |              |           |        |
|                                    | <i>Male</i>            | 0.95       | 0.69- 1.31 | 0.76   |              |           |        |
| <b>Age at start of ICI (years)</b> |                        | 1          |            |        |              |           |        |
|                                    | <i>year</i>            | 1          | 0.99- 1.01 | 0.99   |              |           |        |
| <b>Cancer type</b>                 | <i>mUC</i>             | 1          |            |        |              |           |        |
|                                    | <i>mRCC</i>            | 1.27       | 0.94- 1.71 | 0.13   |              |           |        |
| <b>ECOG PS</b>                     | <i>0</i>               | 1          |            |        |              |           |        |
|                                    | <i>≥1</i>              | 0.83       | 0.61- 1.11 | 0.21   |              |           |        |
| <b>Lung Metastases</b>             | <i>No</i>              | 1          |            |        |              |           |        |
|                                    | <i>Yes</i>             | 1.02       | 0.76- 1.36 | 0.91   |              |           |        |
| <b>Lymph node Metastases</b>       | <i>No</i>              | 1          |            |        |              |           |        |
|                                    | <i>Yes</i>             | 1.12       | 0.76- 1.67 | 0.56   |              |           |        |
| <b>Bone Metastases</b>             | <i>No</i>              | 1          |            |        |              |           |        |
|                                    | <i>Yes</i>             | 0.83       | 0.58- 1.18 | 0.29   |              |           |        |
| <b>Liver Metastases</b>            | <i>No</i>              | 1          |            |        |              |           |        |
|                                    | <i>Yes</i>             | 0.73       | 0.50- 1.07 | 0.10   |              |           |        |
| <b>Brain Metastases</b>            | <i>No</i>              | 1          |            |        |              |           |        |
|                                    | <i>Yes</i>             | 0.50       | 0.16- 1.57 | 0.24   |              |           |        |
| <b>Other Metastases</b>            | <i>No</i>              | 1          |            |        |              |           |        |
|                                    | <i>Yes</i>             | 1.08       | 0.80- 1.46 | 0.63   |              |           |        |
| <b>ICI type</b>                    | <i>ICI Monotherapy</i> | 1          |            | <0.001 | 1            |           | <0.001 |
|                                    | <i>ICI + ICI</i>       | 2.12       | 1.34- 3.36 |        | 1.83         | 1.15-2.91 |        |
|                                    | <i>ICI + Other*</i>    | 2.09       | 1.50- 2.93 |        | 2.29         | 1.55-3.39 |        |
| <b>Line of ICI</b>                 | <i>Second or more</i>  | 1          |            |        | 1            |           |        |
|                                    | <i>First</i>           | 1.36       | 1.13-1.63  | 0.001  | 1.29         | 1.06-1.56 | 0.011  |

|                    |                           |      |           |      |      |           |       |
|--------------------|---------------------------|------|-----------|------|------|-----------|-------|
| <b>Type of ICI</b> | <i>PD-L1 inhibitors**</i> | 1    |           |      | 1    |           |       |
|                    | <i>PD-1 inhibitors***</i> | 1.10 | 0.81-1.50 | 0.53 | 1.64 | 1.15-2.36 | 0.007 |

\*Investigational immunotherapy and targeted therapy agents

\*\*Includes atezolizumab, avelumab, and durvalumab

\*\*\*Includes pembrolizumab and nivolumab

ICI: Immune Checkpoint inhibitor; mRCC: metastatic renal cell carcinoma;

mUC: metastatic urothelial carcinoma; ECOG PS: Eastern Cooperative Oncology Group Performance Status;

PD-L1: programmed cell death ligand 1; PD-1: Programmed cell Death protein 1.
